# Supplementary material for: Optimal Choice as First-Line Therapy for Patients with Triple-Negative Breast Cancer: A Bayesian Network Meta-Analysis
Source: MDPI journal article supplement (doi:10.3390/curroncol29120718), 2022-11-25
Supplement: s1 [file s1]

Supplementals

# Optimal Choice as First-Line Therapy for Patients with Triple-Negative Breast Cancer: A Bayesian Network Meta-Analysis

Yiqun Han, Jiayu Wang \*, Yun Wu, Hangcheng Xu, Yan Wang and Binghe Xu \*

**Table S1.** Characteristics of enrolled studies for network meta-analysis.

| Author.                   | Recruitment period | Published year | ClinicalTrials.gov Identifier | Phase | No. of Patients |         | Treatment                   |                | Median PFS  |                         | Median OS     |                         |
|---------------------------|--------------------|----------------|-------------------------------|-------|-----------------|---------|-----------------------------|----------------|-------------|-------------------------|---------------|-------------------------|
|                           |                    |                |                               |       | Intervention    | Control | Intervention                | Control        | mo.         | Hazard ratio            | mo.           | Hazard ratio            |
| Adam Brufsky et al. [1]   | 2015.03-2016.10    | 2021           | NCT02322814                   | II    | 47              | 43      | Cobimetinib-paclitaxel      | Paclitaxel     | 5.5 vs. 3.8 | 0.73 (95% CI 0.43-1.24) | 16.0 vs. 19.6 | 1.05 (95% CI 0.55-2.01) |
| David Miles et al. [2]    | 2017.08-2019.09    | 2021           | NCT03125902                   | III   | 431             | 220     | Atezolizumab-paclitaxel     | Paclitaxel     | 5.7 vs. 5.6 | 0.82 (95% CI 0.68-0.98) | 22.8 vs. 19.2 | 1.12 (95% CI 0.88-1.43) |
| Javier Cortes et al. [3]  | 2017.01-2018.06    | 2020           | NCT02819518                   | III   | 566             | 281     | Pembrolizumab-CT            | CT             | 7.5 vs. 5.6 | 0.82 (95% CI 0.69-0.97) | 23.0 vs. 16.1 | 0.73 (95% CI 0.55-0.95) |
| Peter Schmid et al. [4]   | 2014.05-2017.06    | 2019           | NCT03997123                   | II    | 70              | 70      | Capivasertib-paclitaxel     | Paclitaxel     | 5.9 vs. 4.2 | 0.74 (95% CI 0.50-1.08) | 19.1 vs. 12.6 | 0.61 (95% CI 0.37-0.99) |
| Sung-Bae Kim et al. [5]   | 2014.09-2016.02    | 2017           | NCT02162719                   | II    | 62              | 62      | Ipatasertib-paclitaxel      | Paclitaxel     | 6.2 vs. 4.9 | 0.60 (95% CI 0.37-0.98) | /             | /                       |
| Rebecca Dent et al. [6,7] | 2018.02-2020.04    | 2021           | NCT03337724                   | III   | 170             | 85      | Ipatasertib-paclitaxel      | Paclitaxel     | 7.4 vs. 6.1 | 1.02 (95% CI 0.71-1.45) | /             | /                       |
| Richard Finn et al. [8]   | 2004.01-2006.10    | 2009           | NCT00075270                   | III   | 71              | 60      | Lapatinib-paclitaxel        | Paclitaxel     | 4.6 vs. 4.8 | 1.25 (95% CI 0.85-1.83) | /             | /                       |
| Peter Schmid et al. [9]   | 2015.06-2017.05    | 2019           | NCT02425891                   | III   | 451             | 451     | Atezolizumab-nab-paclitaxel | nab-paclitaxel | 7.2 vs. 5.5 | 0.80 (95% CI 0.69-0.92) | 21.0 vs. 18.7 | 0.86 (95% CI 0.72-1.02) |

**Table S2.** Ranking probability of included treatments regarding progression-free survival.

| Treatment | SUCRA | Rank1  | Rank2  | Rank3  | Rank4  | Rank5  |
|-----------|-------|--------|--------|--------|--------|--------|
| CT+AKTi   | 91.6% | 78.67% | 11.11% | 8.45%  | 1.39%  | 0.39%  |
| CT+PD-L1i | 67.2% | 10.24% | 50.24% | 37.47% | 2.06%  | 0.01%  |
| CT+PD-1i  | 63.0% | 10.74% | 36.84% | 46.56% | 5.29%  | 0.59%  |
| CT        | 15.4% | 0.00%  | 0.00%  | 1.14%  | 59.38% | 39.49% |
| CT+TKIs   | 12.9% | 0.37%  | 1.83%  | 6.39%  | 31.89% | 59.54% |

**Table S3.** Ranking probability of included treatments regarding overall survival.

| Treatment | SUCRA | Rank1  | Rank2  | Rank3  | Rank4  | Rank5  |
|-----------|-------|--------|--------|--------|--------|--------|
| CT+AKTi   | 89.2% | 70.53% | 20.85% | 5.51%  | 2.00%  | 1.12%  |
| CT+PD-1i  | 76.0% | 23.25% | 60.67% | 13.80% | 1.73%  | 0.56%  |
| CT+PD-L1i | 38.3% | 0.37%  | 6.31%  | 49.01% | 35.00% | 9.32%  |
| CT+TKIs   | 26.7% | 5.85%  | 11.76% | 18.76% | 8.20%  | 55.44% |
| CT        | 19.8% | 0.01%  | 0.42%  | 12.93% | 53.08% | 33.57% |

**Table S4.** Ranking probability of progress-free survival in PD-L1 positive patients.

| Treatment | SUCRA | Rank1  | Rank2  | Rank3  |
|-----------|-------|--------|--------|--------|
| PD-1i+CT  | 87.6% | 75.31% | 24.56% | 0.14%  |
| PD-L1i+CT | 62.3% | 24.70% | 75.24% | 0.07%  |
| CT        | 0.1%  | 0.00%  | 0.21%  | 99.80% |

**Table S5.** Ranking probability of overall survival in PD-L1 positive patients.

| Treatment | SUCRA | Rank1  | Rank2  | Rank3  |
|-----------|-------|--------|--------|--------|
| PD-1i+CT  | 94.6% | 90.31% | 8.51%  | 1.19%  |
| PD-L1i+CT | 50.2% | 9.55%  | 81.20% | 9.25%  |
| CT        | 5.3%  | 0.15%  | 10.30% | 89.56% |

**Table S6.** Ranking probability of included treatments regarding rash.

| Treatment | SUCRA | Rank1  | Rank2  | Rank3  | Rank4  |
|-----------|-------|--------|--------|--------|--------|
| CT+TKIs   | 9.3%  | 1.91%  | 2.66%  | 16.84% | 78.60% |
| CT+AKTi   | 32.6% | 4.41%  | 7.96%  | 68.59% | 19.04% |
| CT+PD-L1i | 75.0% | 39.89% | 47.34% | 10.67% | 2.11%  |
| CT        | 83.1% | 53.79% | 42.04% | 3.91%  | 0.26%  |

**Table S7.** Ranking probability of included treatments regarding diarrhea.

| Treatment | SUCRA | Rank1  | Rank2  | Rank3  | Rank4  |
|-----------|-------|--------|--------|--------|--------|
| CT+AKTi   | 12.3% | 0.81%  | 2.17%  | 30.11% | 66.92% |
| CT+TKIs   | 27.3% | 3.80%  | 5.56%  | 59.28% | 31.37% |
| CT+PD-L1i | 75.2% | 36.69% | 53.93% | 7.78%  | 1.61%  |
| CT        | 85.2% | 58.71% | 38.35% | 2.84%  | 0.11%  |

**Table S8.** Ranking probability of included treatments regarding peripheral neuropathy.

| Treatment | SUCRA | Rank1  | Rank2  | Rank3  | Rank4  |
|-----------|-------|--------|--------|--------|--------|
| CT+AKTi   | 20.9% | 4.99%  | 12.12% | 23.64% | 59.27% |
| CT+PD-L1i | 36.5% | 8.07%  | 21.55% | 42.35% | 28.04% |
| CT        | 61.9% | 16.32% | 56.08% | 24.46% | 3.15%  |
| CT+TKIs   | 80.7% | 70.63% | 10.26% | 9.57%  | 9.55%  |

**Table S9.** Ranking probability of included treatments regarding neutropenia.

| <b>Treatment</b> | <b>SUCRA</b> | <b>Rank1</b> | <b>Rank2</b> | <b>Rank3</b> | <b>Rank4</b> |
|------------------|--------------|--------------|--------------|--------------|--------------|
| CT+PD-L1i        | 23.2%        | 5.08%        | 13.81%       | 26.90%       | 54.22%       |
| CT+AKTi          | 39.4%        | 11.48%       | 28.79%       | 26.28%       | 33.46%       |
| CT               | 51.0%        | 6.53%        | 46.72%       | 40.02%       | 6.74%        |
| CT+TKIs          | 86.3%        | 76.92%       | 10.70%       | 6.81%        | 5.58%        |

01. triple-negative breast cancer/
02. triple-negative breast cancer.tw.
03. 1 or 2
04. first-line
05. metastasis/
06. metastasis.tw.
07. 5 or 6
08. 3 and 4 and 7
09. randomized controlled trials/
10. randomized-controlled-trial.pt
11. controlled-clinical-trial.pt
12. random allocation/
13. 9 or 10 or 11 or 12
14. comparative study/
15. exp evaluation studies/
16. follow-up studies/
17. prospective studies/
18. 14 or 15 or 16 or 17
19. 8 and 13 and 18

**Figure S1.** Search strategy for literature selection.

|                    | Random sequence generation (selection bias) | Allocation concealment (selection bias) | Blinding of participants and personnel (performance bias) | Blinding of outcome assessment (detection bias) | Incomplete outcome data (attrition bias) | Selective reporting (reporting bias) | Other bias |
|--------------------|---------------------------------------------|-----------------------------------------|-----------------------------------------------------------|-------------------------------------------------|------------------------------------------|--------------------------------------|------------|
| Adam Brufsky 2021  | ?                                           | ?                                       | +                                                         | +                                               | +                                        | +                                    | ?          |
| David Miles 2021   | ?                                           | ?                                       | +                                                         | +                                               | +                                        | +                                    | ?          |
| Javier Cortes 2020 | ?                                           | ?                                       | +                                                         | +                                               | +                                        | +                                    | ?          |
| Peter Schmid 19    | ?                                           | ?                                       | +                                                         | +                                               | +                                        | +                                    | ?          |
| Peter Schmid 2019  | ?                                           | ?                                       | +                                                         | +                                               | ?                                        | ?                                    | ?          |
| Rebecca Dent 2021  | ?                                           | ?                                       | ?                                                         | +                                               | +                                        | +                                    | ?          |
| Richard Finn 2009  | ?                                           | ?                                       | +                                                         | ?                                               | +                                        | +                                    | ?          |
| Sung-Bae Kim 2017  | ?                                           | ?                                       | +                                                         | +                                               | +                                        | +                                    | ?          |

**Figure S2.** Quality assessment of individual study. Green represents low risk of bias, yellow represents unclear risk of bias, and red represents high risk of bias.

|                      |                      |                      |
|----------------------|----------------------|----------------------|
| <b>PD-L1i+CT</b>     | 1.10<br>(0.86, 1.40) | 0.80<br>(0.71, 0.92) |
| 0.92<br>(0.73, 1.20) | <b>PD-1i+CT</b>      | 0.74<br>(0.61, 0.90) |
| 1.20<br>(1.10, 1.40) | 1.40<br>(1.10, 1.60) | <b>CT</b>            |

**Figure S3.** Comparative analysis for progression-free survival in PD-L1 positive patients.

|                     |                      |                      |
|---------------------|----------------------|----------------------|
| <b>PD-L1i+CT</b>    | 0.81<br>(0.59, 1.10) | 0.73<br>(0.56, 0.96) |
| 1.2<br>(0.90, 1.70) | <b>PD-1i+CT</b>      | 0.90<br>(0.77, 1.10) |
| 1.4<br>(1.0, 1.80)  | 1.1<br>(0.95, 1.30)  | <b>CT</b>            |

**Figure S4.** Comparative analysis for overall survival in PD-L1 positive patients.

|                      |                      |                       |                      |
|----------------------|----------------------|-----------------------|----------------------|
| <b>CT</b>            | 0.56<br>(0.24, 1.30) | 0.95<br>(0.44, 2.00)  | 0.32<br>(0.08, 1.00) |
| 1.80<br>(0.77, 4.20) | <b>CT+AKTi</b>       | 1.70<br>(0.52, 5.30)  | 0.33<br>(0.07, 1.40) |
| 1.00<br>(0.49, 2.30) | 0.58<br>(0.19, 1.90) | <b>CT+PD-L1i</b>      | 0.57<br>(0.11, 2.50) |
| 3.10<br>(0.96, 13.0) | 1.80<br>(0.41, 9.30) | 3.00<br>(0.73, 14.00) | <b>CT+TKI</b>        |

**Figure S5.** Comparative analysis for the risk of rash among identified treatments.

|                       |                      |                       |                      |
|-----------------------|----------------------|-----------------------|----------------------|
| <b>CT</b>             | 0.30<br>(0.11, 0.76) | 0.93<br>(0.36, 2.30)  | 0.39<br>(0.09, 1.40) |
| 3.30<br>(1.30, 9.10)  | <b>CT+AKTi</b>       | 3.10<br>(0.82, 12.00) | 1.30<br>(0.24, 6.70) |
| 1.10<br>(0.43, 2.80)  | 0.32<br>(0.08, 1.20) | <b>CT+PD-L1i</b>      | 0.42<br>(0.08, 2.10) |
| 2.60<br>(0.70, 11.00) | 0.77<br>(0.15, 4.20) | 2.40<br>(0.49, 13.00) | <b>CT+TKI</b>        |

**Figure S6.** Comparative analysis for the risk of diarrhea among identified treatments.

|                      |                      |                      |                      |
|----------------------|----------------------|----------------------|----------------------|
| <b>CT</b>            | 0.74<br>(0.41, 1.30) | 0.86<br>(0.55, 1.40) | 1.40<br>(0.52, 3.70) |
| 1.30<br>(0.76, 2.40) | <b>CT+AKTi</b>       | 1.20<br>(0.57, 2.50) | 1.90<br>(0.59, 5.80) |
| 1.20<br>(0.71, 1.80) | 0.87<br>(0.41, 1.80) | <b>CT+PD-L1i</b>     | 1.60<br>(0.54, 4.80) |
| 0.72<br>(0.27, 1.90) | 0.53<br>(0.17, 1.70) | 0.63<br>(0.21, 1.80) | <b>CT+TKI</b>        |

**Figure S7.** Comparative analysis for the risk of neuropathy among identified treatments.

|                      |                      |                      |                       |
|----------------------|----------------------|----------------------|-----------------------|
| <b>CT</b>            | 0.90<br>(0.30, 2.40) | 0.77<br>(0.32, 1.80) | 1.90<br>(0.51, 7.70)  |
| 1.10<br>(0.42, 3.40) | <b>CT+AKTi</b>       | 0.84<br>(0.24, 3.50) | 2.10<br>(0.41, 12.00) |
| 1.30<br>(0.56, 3.10) | 1.20<br>(0.28, 4.20) | <b>CT+PD-L1i</b>     | 2.50<br>(0.49, 13.00) |
| 0.52<br>(0.13, 2.00) | 0.47<br>(0.08, 2.40) | 0.40<br>(0.08, 2.00) | <b>CT+TKI</b>         |

**Figure S8.** Comparative analysis for the risk of neutropenia among identified treatments.

## References

1. Brufsky, A.; Kim, S.; Zvirbulis, J.; Eniu, A.; Mebis, J.; Sohn, J.; Wongchenko, M.; Chohan, S.; Amin, R.; Yan, Y.; et al. A phase II randomized trial of cobimetinib plus chemotherapy, with or without atezolizumab, as first-line treatment for patients with locally advanced or metastatic triple-negative breast cancer (COLET): primary analysis. *Ann. Oncol.* **2021**, *32*, 652–660, <https://doi.org/10.1016/j.annonc.2021.01.065>.
2. Miles, D.; Gligorov, J.; André, F.; Cameron, D.; Schneeweiss, A.; Barrios, C.; Xu, B.; Wardley, A.; Kaen, D.; Andrade, L.; et al. Primary results from IMpassion131, a double-blind, placebo-controlled, randomised phase III trial of first-line paclitaxel with or without atezolizumab for unresectable locally advanced/metastatic triple-negative breast cancer. *Ann. Oncol.* **2021**, *32*, 994–1004, <https://doi.org/10.1016/j.annonc.2021.05.801>.
3. Cortes, J.; Cescon, D.W.; Rugo, H.S.; Nowecki, Z.; Im, S.-A.; Yusof, M.M.; Gallardo, C.; Lipatov, O.; Barrios, C.H.; Holgado, E.; et al. Pembrolizumab plus chemotherapy versus placebo plus chemotherapy for previously untreated locally recurrent inoperable or metastatic triple-negative breast cancer (KEYNOTE-355): a randomised, placebo-controlled, double-blind, phase 3 clinical trial. *Lancet* **2020**, *396*, 1817–1828, [https://doi.org/10.1016/s0140-6736\(20\)32531-9](https://doi.org/10.1016/s0140-6736(20)32531-9).
4. Schmid, P.; Abraham, J.; Chan, S.; Wheatley, D.; Brunt, A.M.; Nemsadze, G.; Baird, R.D.; Park, Y.H.; Hall, P.S.; Perren, T.; et al. Capivasertib Plus Paclitaxel Versus Placebo Plus Paclitaxel As First-Line Therapy for Metastatic Triple-Negative Breast Cancer: The PAKT Trial. *J. Clin. Oncol.* **2020**, *38*, 423–433, doi:10.1200/jco.19.00368.
5. Kim, S.-B.; Dent, R.; Im, S.-A.; Espié, M.; Blau, S.; Tan, A.R.; Isakoff, S.J.; Oliveira, M.; Saura, C.; Wongchenko, M.J.; et al. Ipatasertib plus paclitaxel versus placebo plus paclitaxel as first-line therapy for metastatic triple-negative breast cancer (LOTUS): a multi-centre, randomised, double-blind, placebo-controlled, phase 2 trial. *Lancet Oncol.* **2017**, *18*, 1360–1372, doi:10.1016/s1470-2045(17)30450-3.

- 
6. Dent R, Kim S-B, Oliveira M, Barrios C, O'Shaughnessy J, Isakoff SJ, et al. Abstract GS3-04: Double-blind placebo (PBO)-controlled randomized phase III trial evaluating first-line ipatasertib (IPAT) combined with paclitaxel (PAC) for PIK3CA/AKT1/PTEN-altered locally advanced unresectable or metastatic triple-negative breast cancer (aTNBC): primary results from IPATunity130 Cohort A. *Cancer Research*. 2021;81:GS3-04-GS3-.
  7. Dent, R.; Oliveira, M.; Isakoff, S.J.; Im, S.-A.; Espié, M.; Blau, S.; Tan, A.R.; Saura, C.; Wongchenko, M.J.; Xu, N.; et al. Final results of the double-blind placebo-controlled randomized phase 2 LOTUS trial of first-line ipatasertib plus paclitaxel for inoperable locally advanced/metastatic triple-negative breast cancer. *Breast Cancer Res. Treat.* **2021**, *189*, 377–386, <https://doi.org/10.1007/s10549-021-06143-5>.
  8. Finn, R.S.; Press, M.F.; Dering, J.; Arbushites, M.; Koehler, M.; Oliva, C.; Williams, L.S.; Di Leo, A. Estrogen Receptor, Progesterone Receptor, Human Epidermal Growth Factor Receptor 2 (HER2), and Epidermal Growth Factor Receptor Expression and Benefit From Lapatinib in a Randomized Trial of Paclitaxel With Lapatinib or Placebo As First-Line Treatment in HER2-Negative or Unknown Metastatic Breast Cancer. *J. Clin. Oncol.* **2009**, *27*, 3908–3915, <https://doi.org/10.1200/jco.2008.18.1925>.
  9. Schmid, P.; Rugo, H.S.; Adams, S.; Schneeweiss, A.; Barrios, C.H.; Iwata, H.; Diéras, V.; Henschel, V.; Molinero, L.; Chui, S.Y.; et al. Atezolizumab plus nab-paclitaxel as first-line treatment for unresectable, locally advanced or metastatic triple-negative breast cancer (IMpassion130): updated efficacy results from a randomised, double-blind, placebo-controlled, phase 3 trial. *Lancet Oncol.* **2019**, *21*, 44–59, [https://doi.org/10.1016/s1470-2045\(19\)30689-8](https://doi.org/10.1016/s1470-2045(19)30689-8).
